# Supplementary material
Source: PubMed Central journal article supplement (PMC4853763)
Supplement: NIHMS740729-supplement-supp_fig1.pdf [file NIHMS740729-supplement-supp_fig1.pdf]

**Figure 3.A Pull-down assays  
E6 mutants  
Experiment 1**

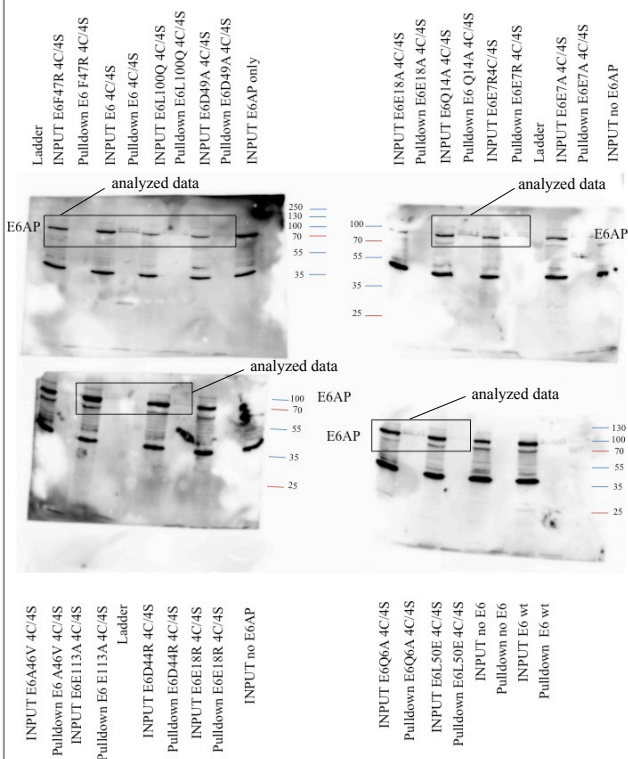

**Figure 3.A Pull-down assays  
E6 mutants  
Experiment 2**

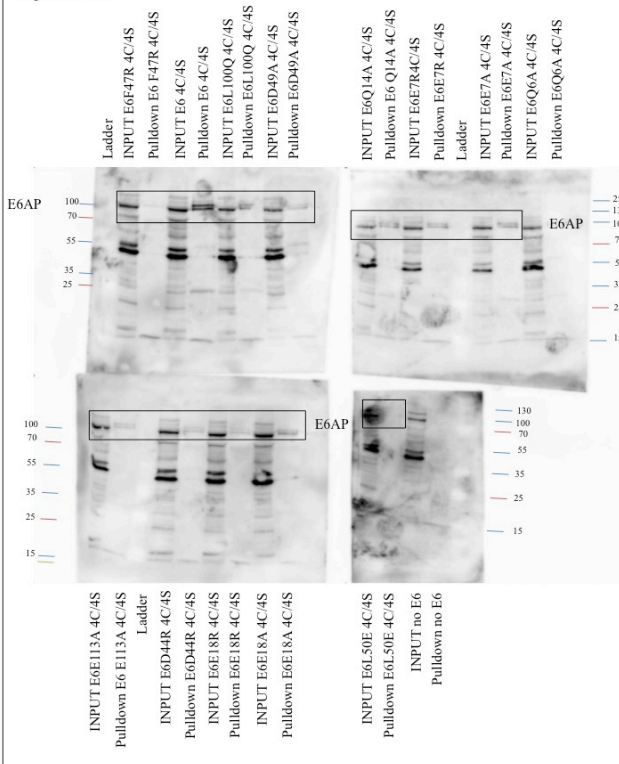

**Figure 3.A Pull-down assays  
E6 mutants  
Experiment 3**

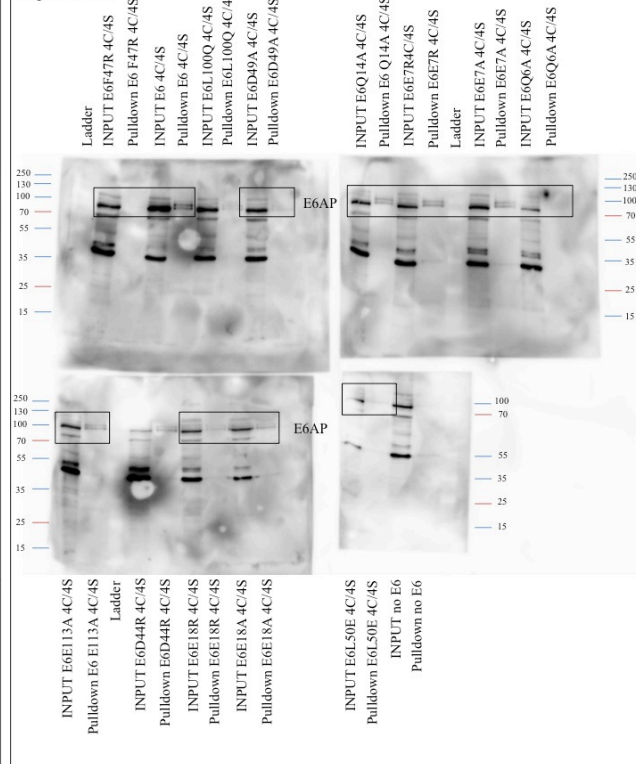

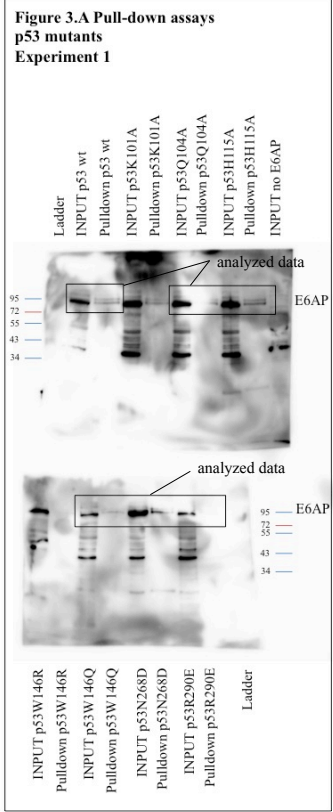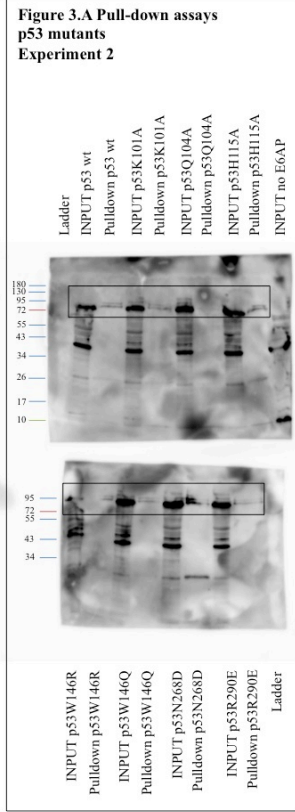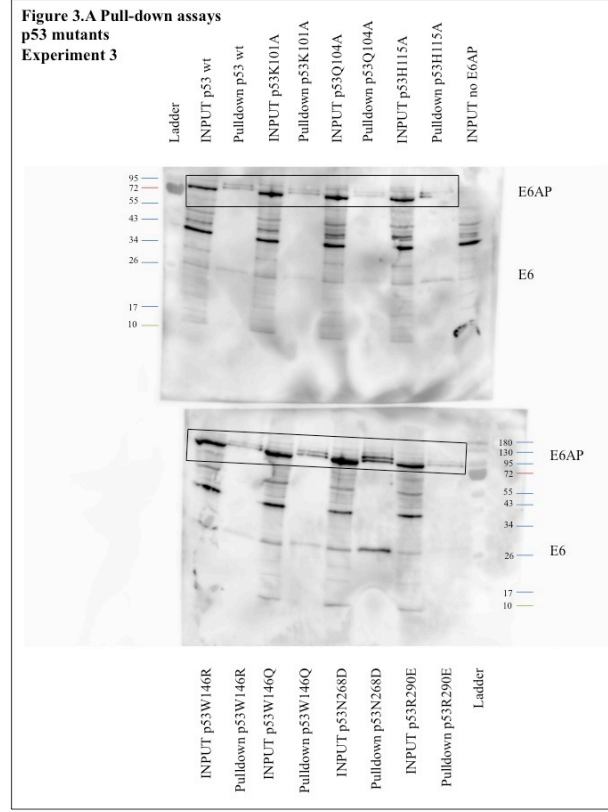

**Extended Data Figure 8**  
**E6 mutants expression**

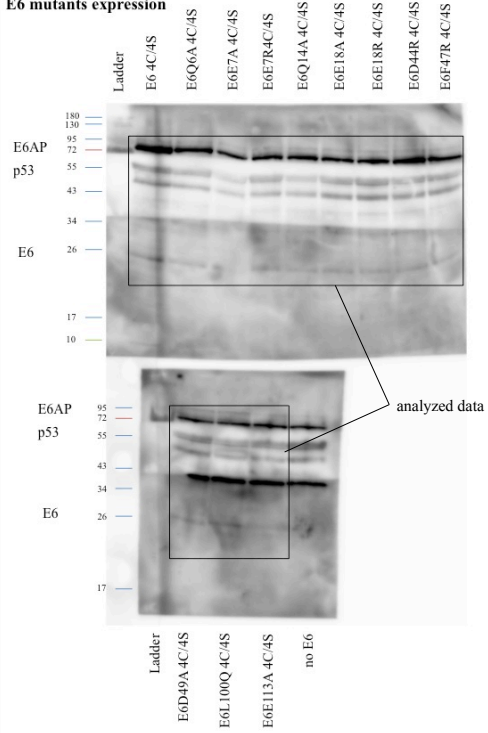

**Extended Data Figure 8**  
**p53 mutants expression**

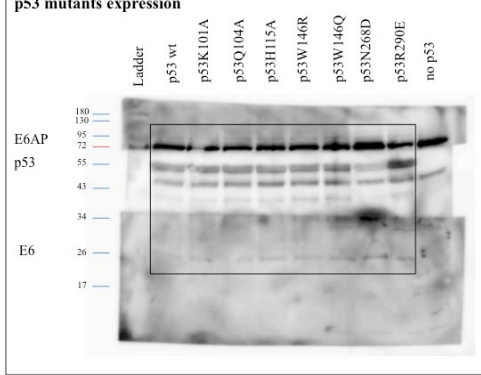

# Figure 3B

## p53 degradation experiments

### E6 mutants

#### Experiment 1

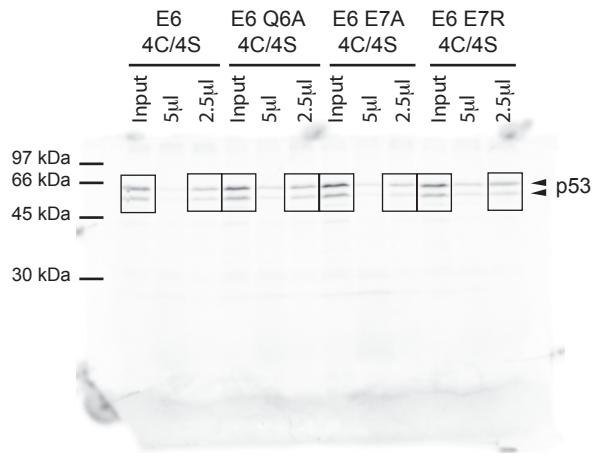

#### Experiment 2

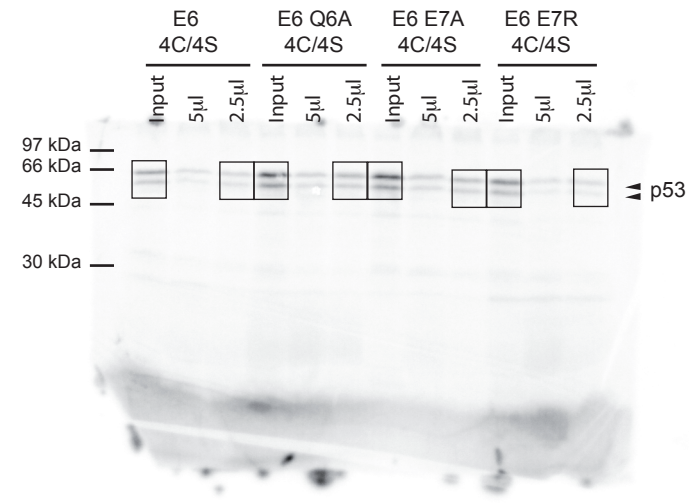

#### Experiment 3

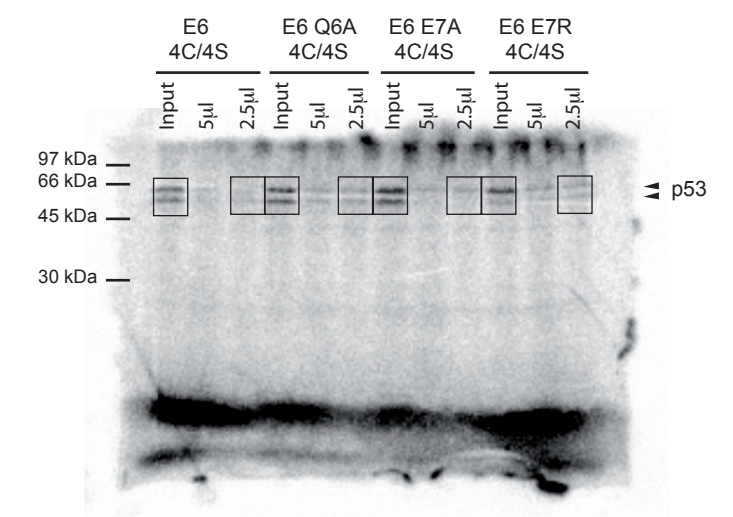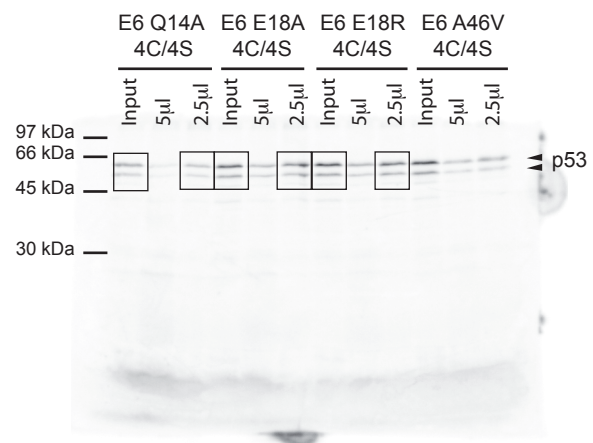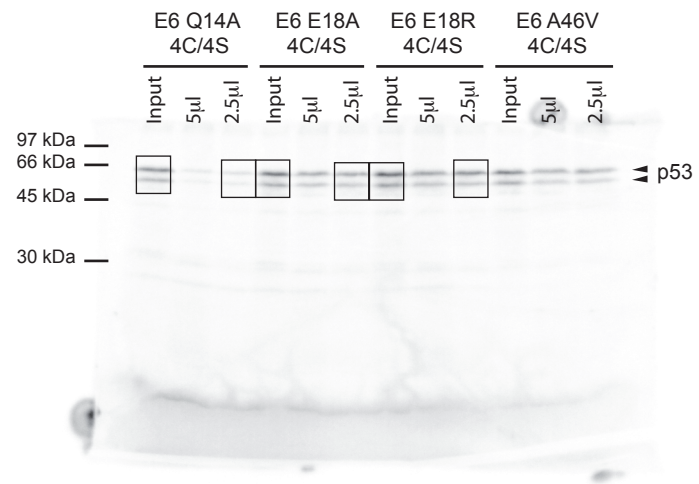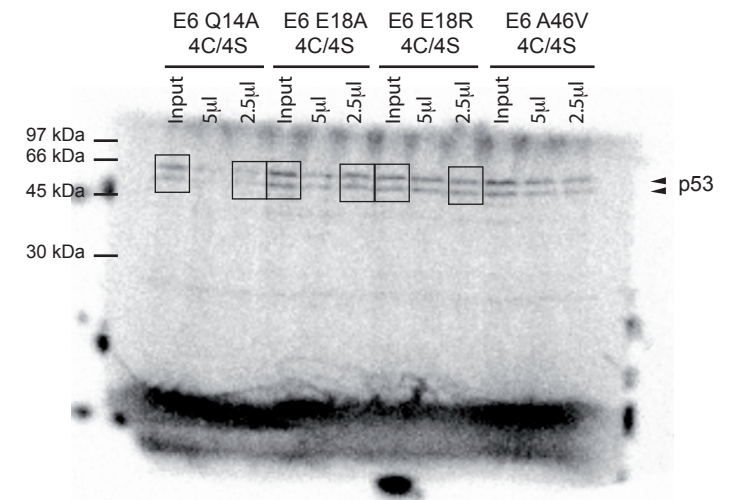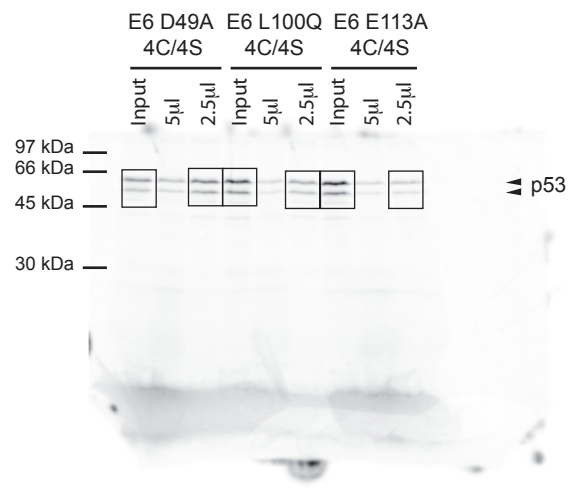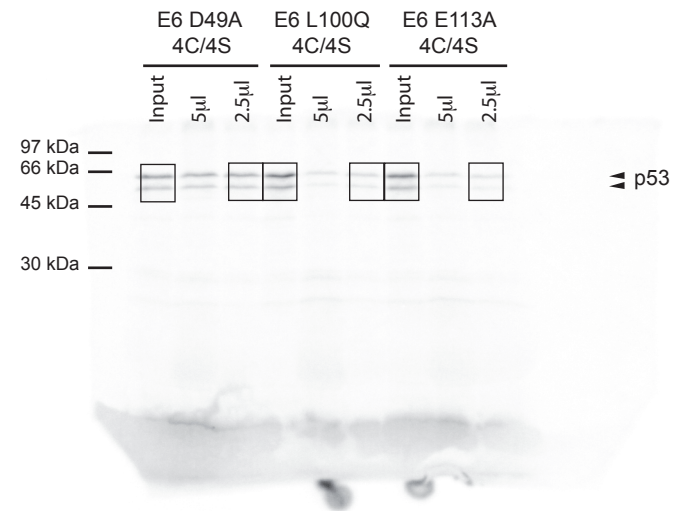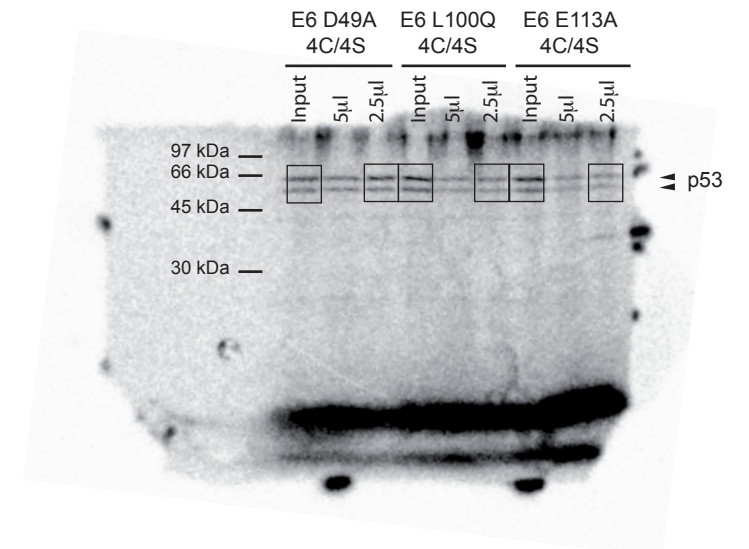

■ Analyzed bands



### Figure 3B

p53 degradation experiments  
p53 mutants

Experiment 1

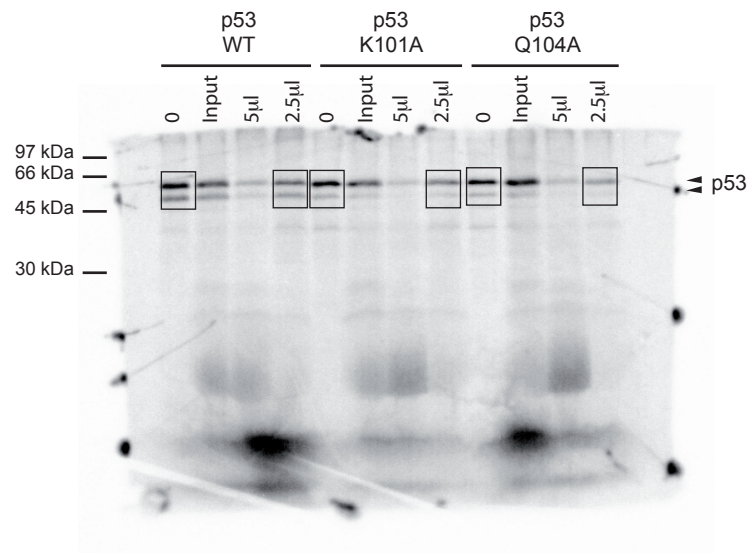

Experiment 2

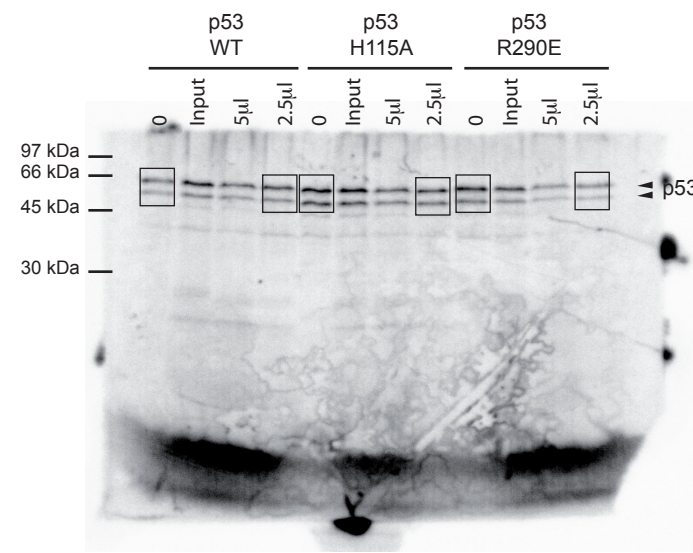

Experiment 3

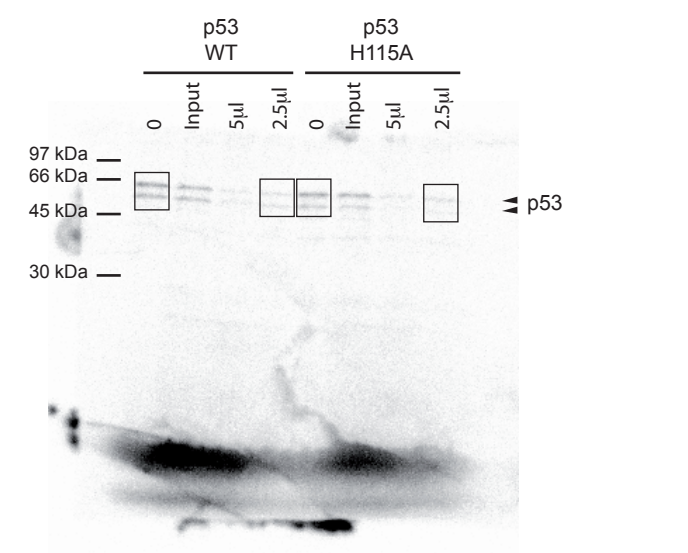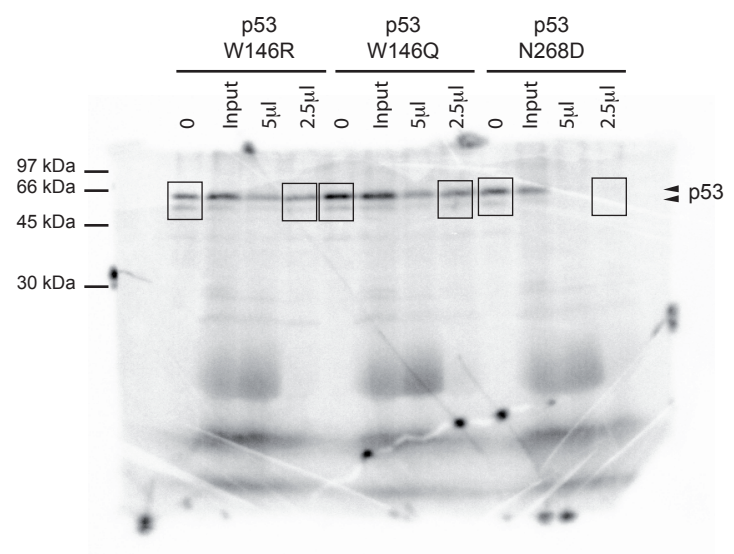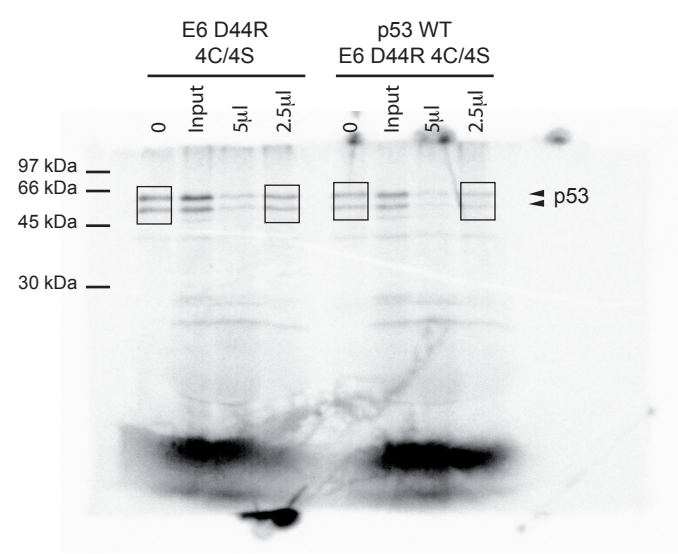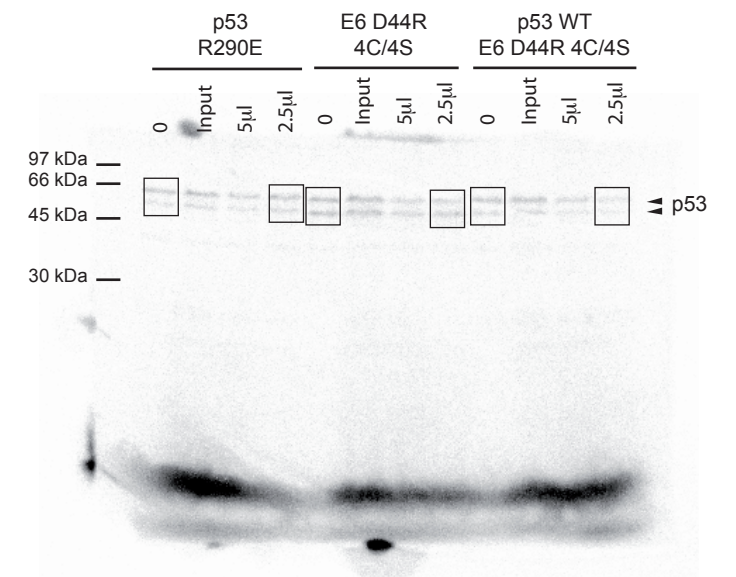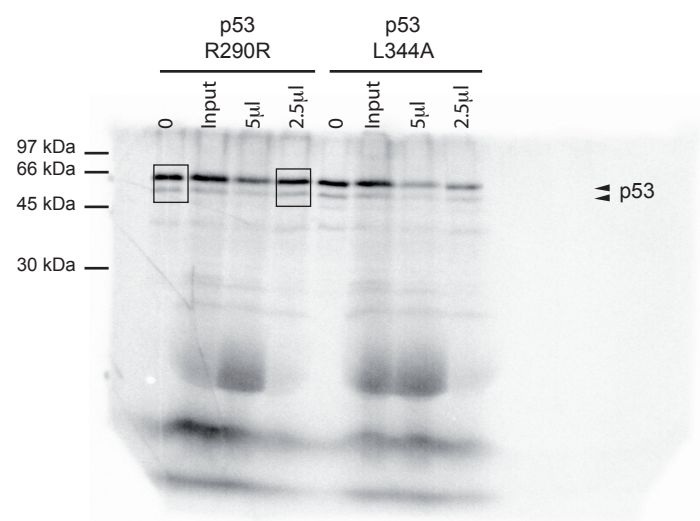

□ Analyzed bands



### Figure 3B

p53 degradation experiments  
p53 mutants (continued)

Experiment 4

Experiment 5

Experiment 6

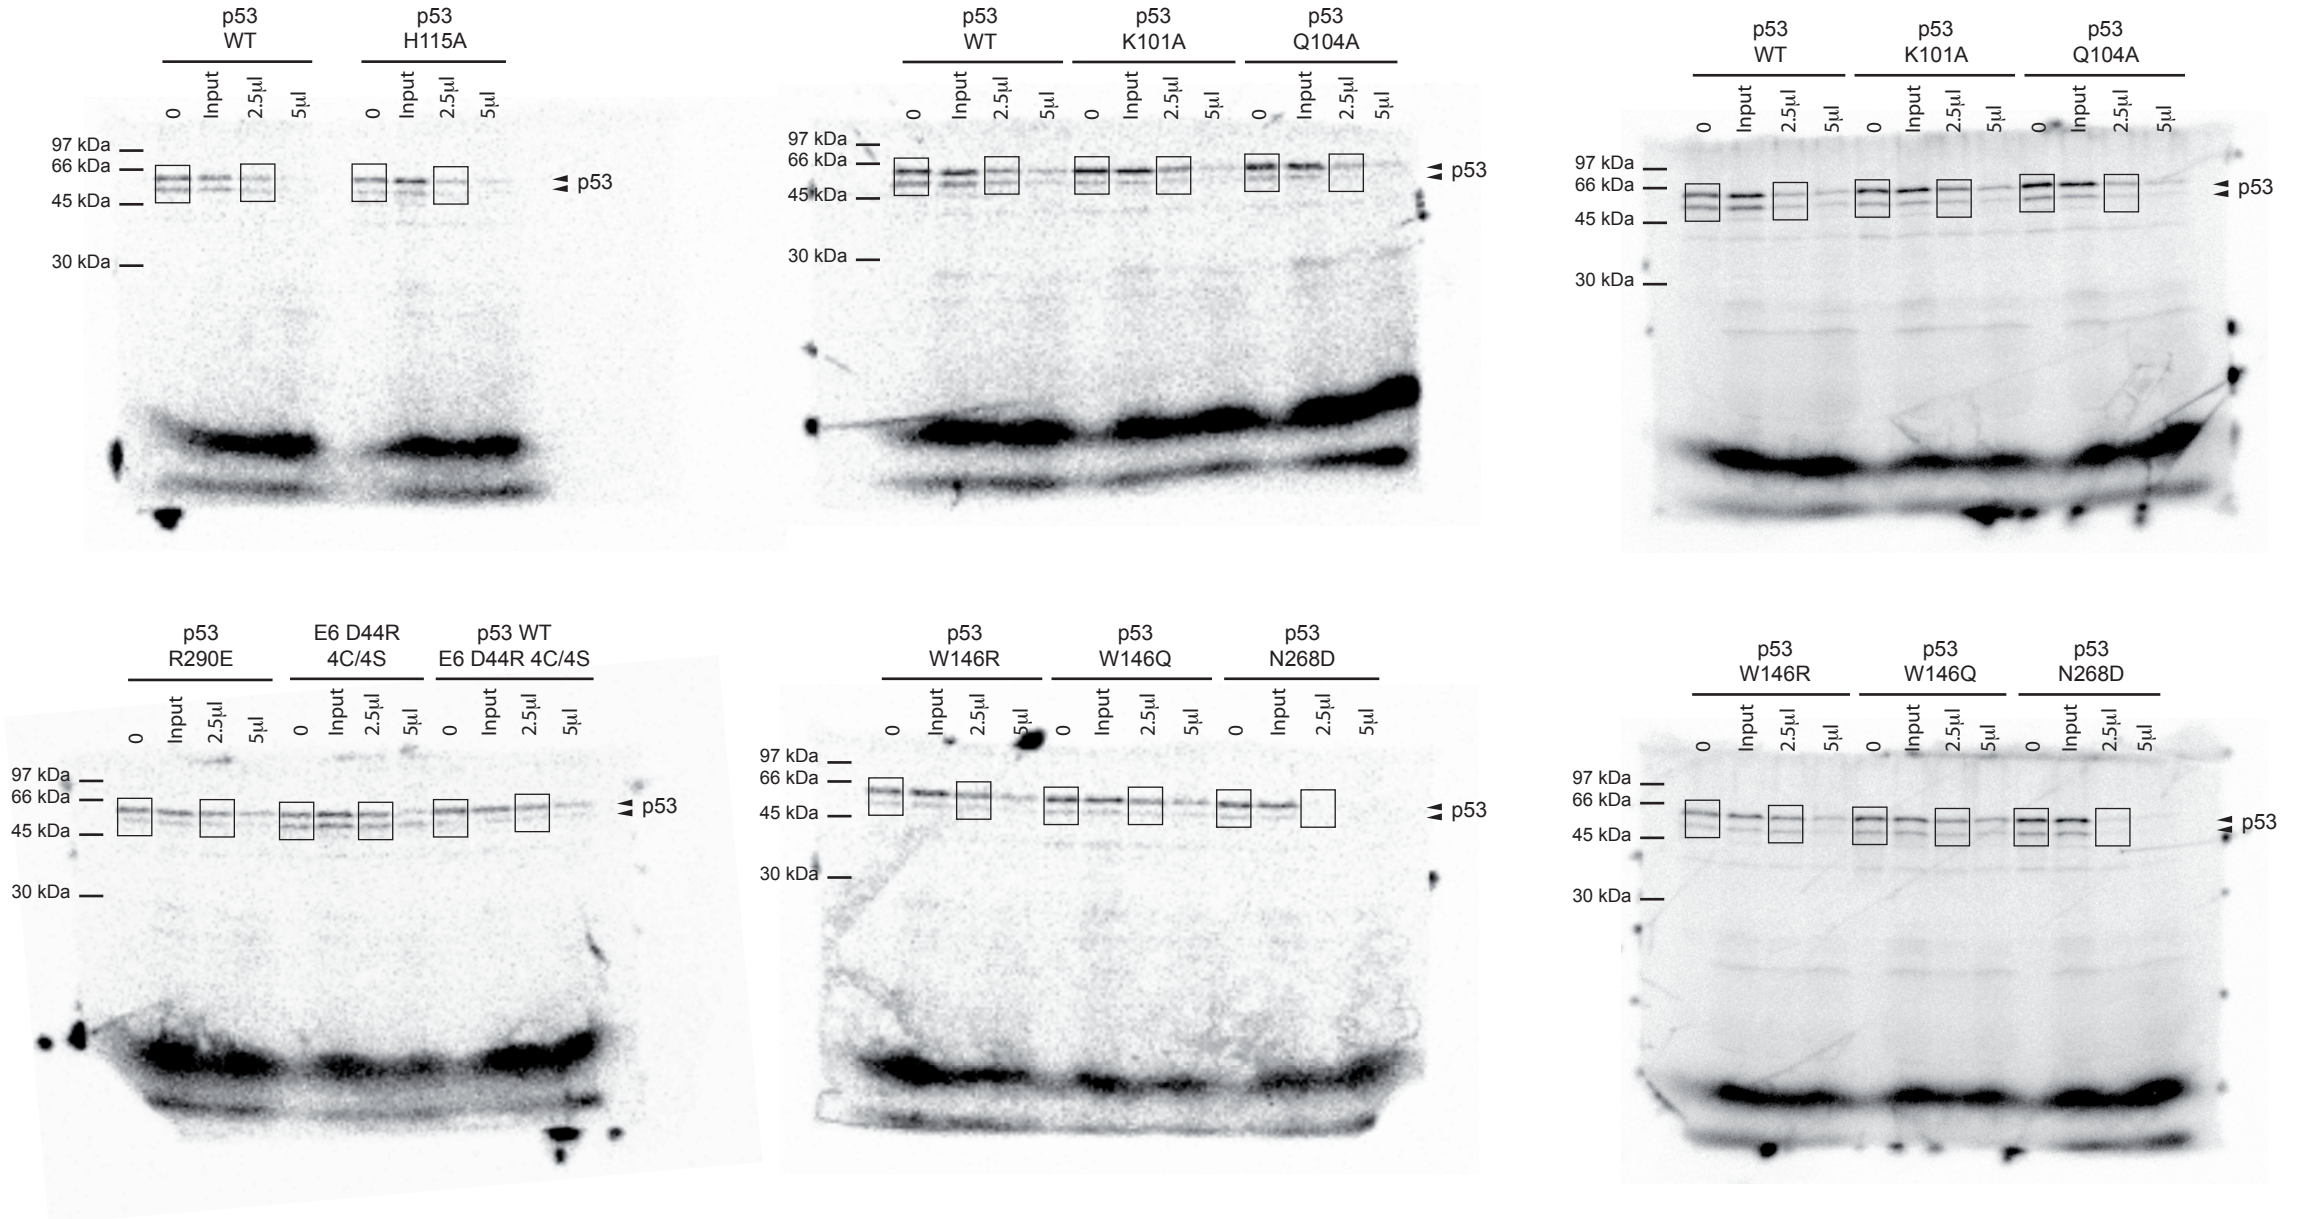

□ Analyzed bands
